# Supplementary material for: Study of polyphenols fromCaesalpinia paraguariensisas α-glucosidase inhibitors: kinetics and structure–activity relationship
Source: Royal Society of Chemistry journal article supplement (doi:10.1039/d1nj04619e), 2022-01-01
Supplement: d1nj04619e1.pdf [file d1nj04619e1.pdf]

### Supplementary information

**Lineweaver-Burk double-reciprocal plot of the inhibition kinetics of  $\alpha$ -glucosidase by compound 2**

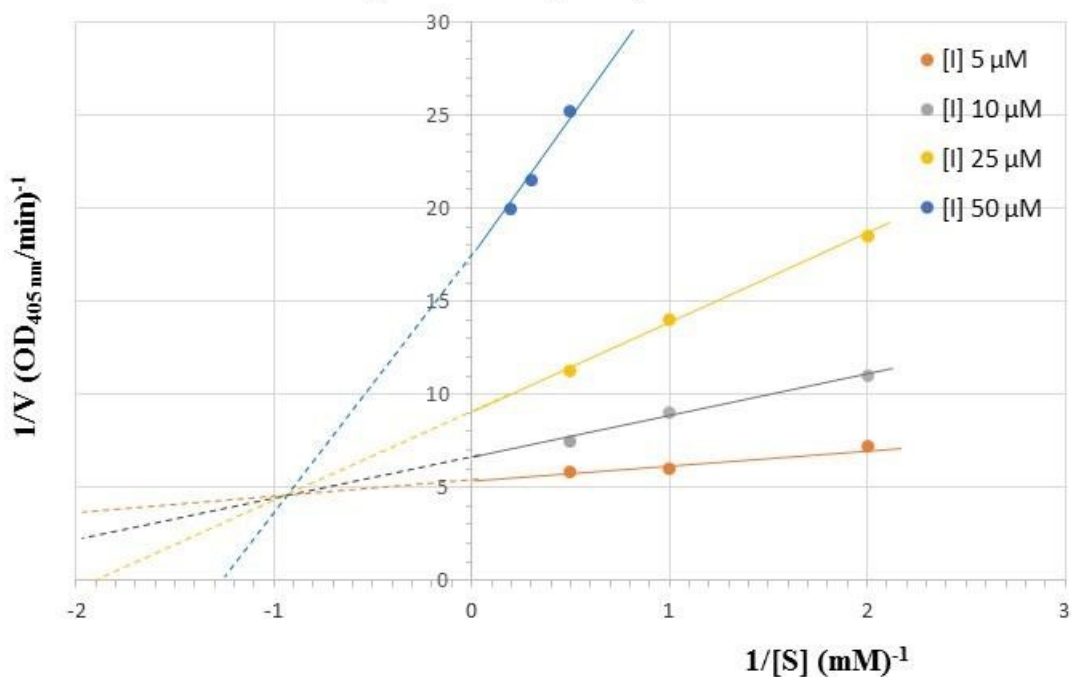

**Lineweaver-Burk double-reciprocal plot of the inhibition kinetics of  $\alpha$ -glucosidase by compound 4**

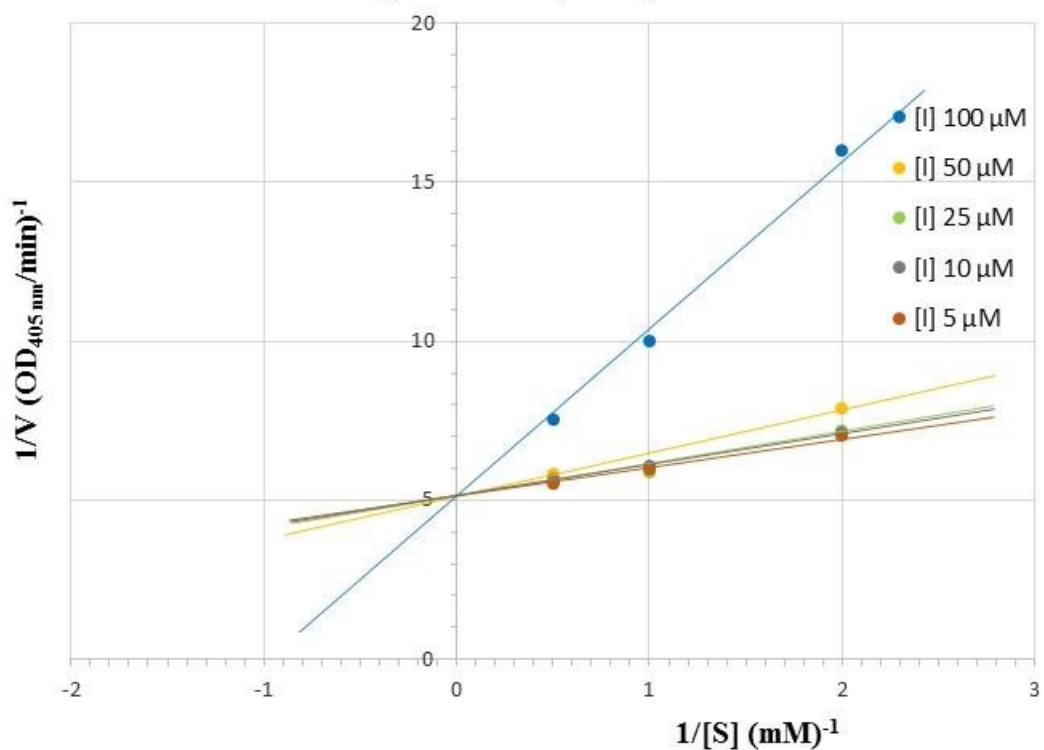

**Lineweaver-Burk double-reciprocal plot of the inhibition kinetics of  $\alpha$ -glucosidase by compound 7**

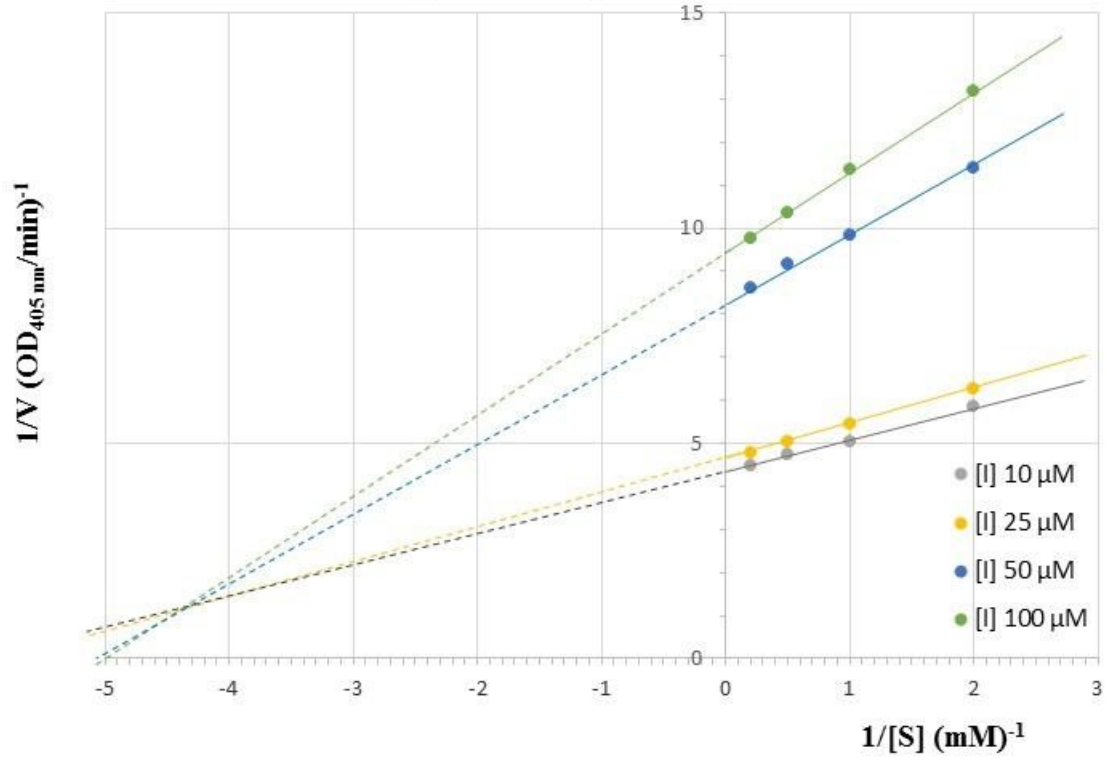

**Lineweaver-Burk double-reciprocal plot of the inhibition kinetics of  $\alpha$ -glucosidase by compound 3**

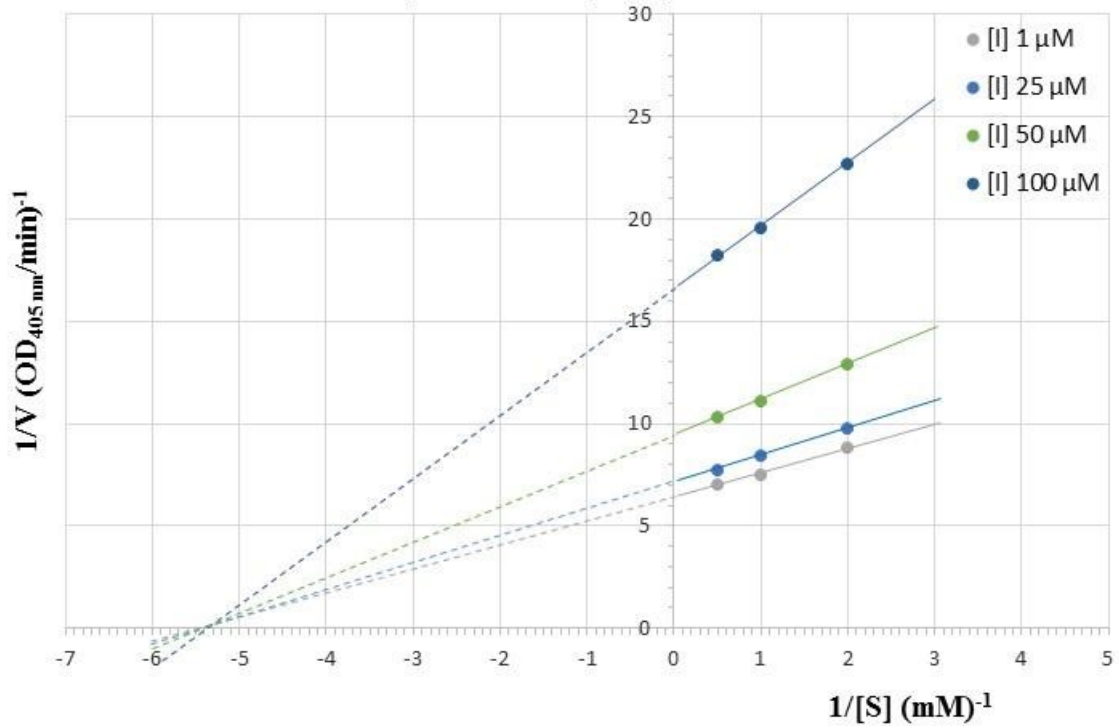

**Lineweaver-Burk double-reciprocal plot of the inhibition kinetics of  $\alpha$ -glucosidase by compound 5**

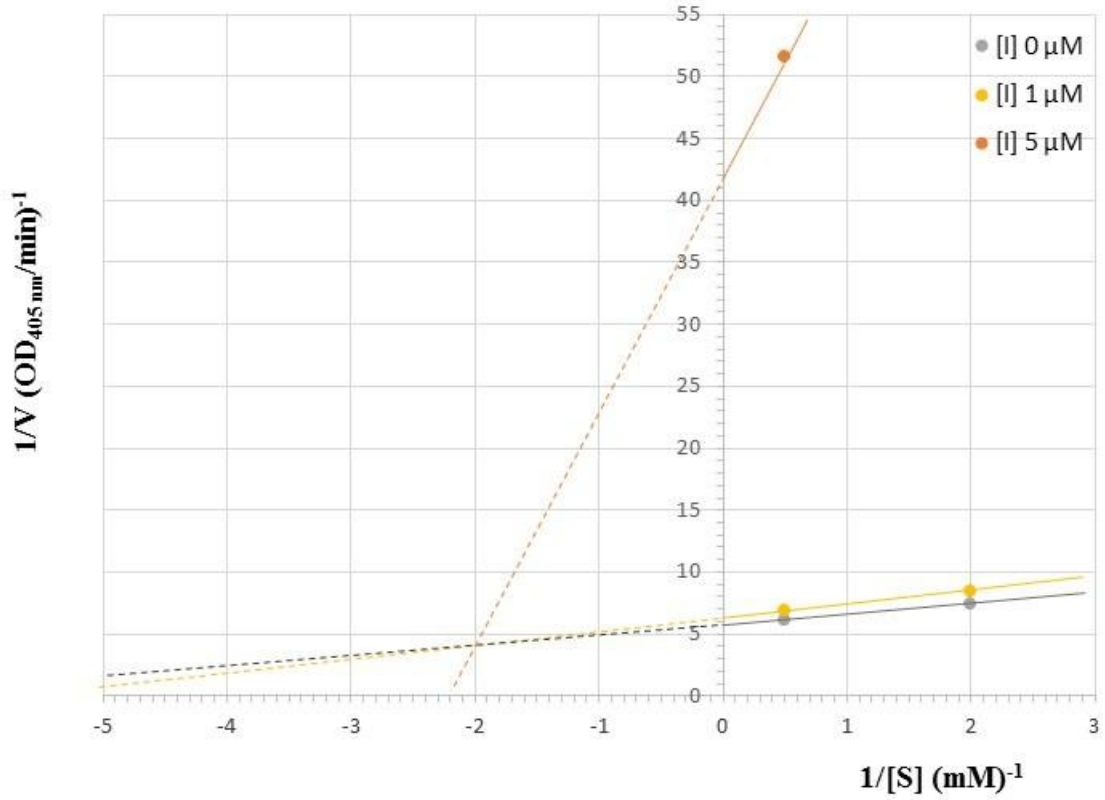

**Lineweaver-Burk double-reciprocal plot of the inhibition kinetics of  $\alpha$ -glucosidase by compound 6**

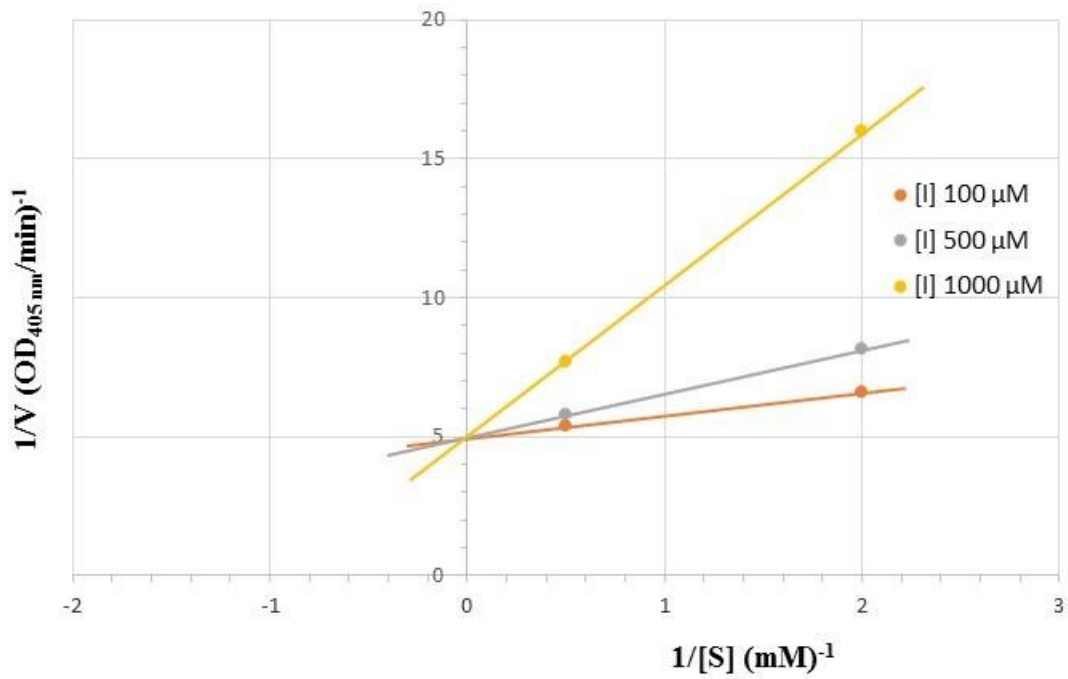

**Lineweaver-Burk double-reciprocal plot of the inhibition kinetics of  $\alpha$ -glucosidase by compound 1**

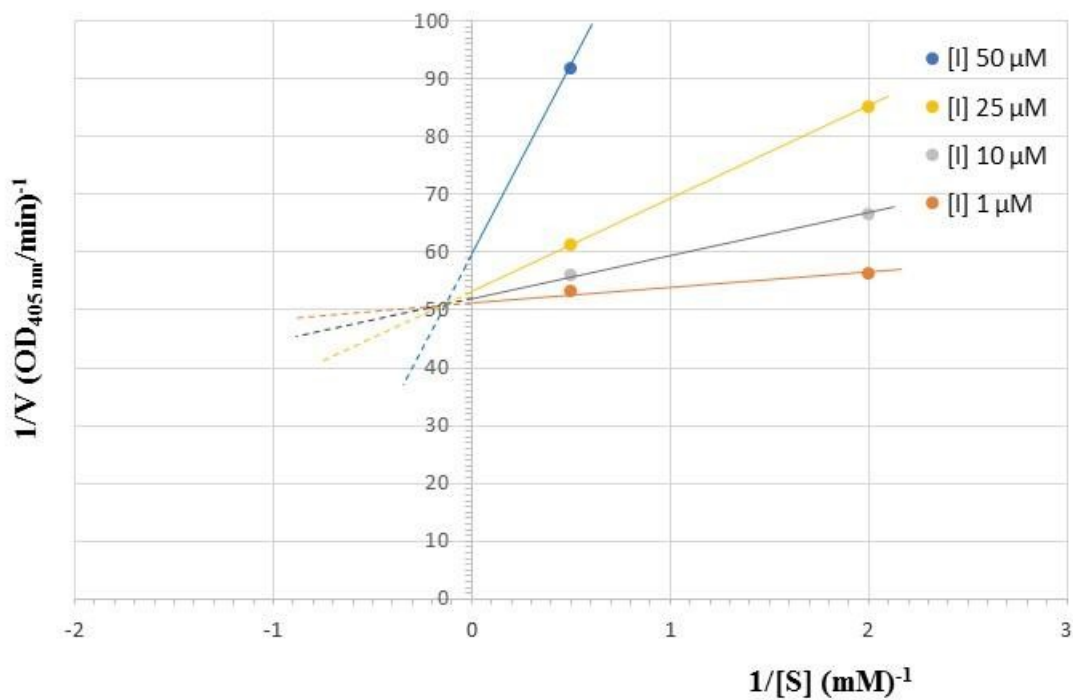

**Chromatogram of Fractions IV–V (that showed the highest inhibitory activity)**

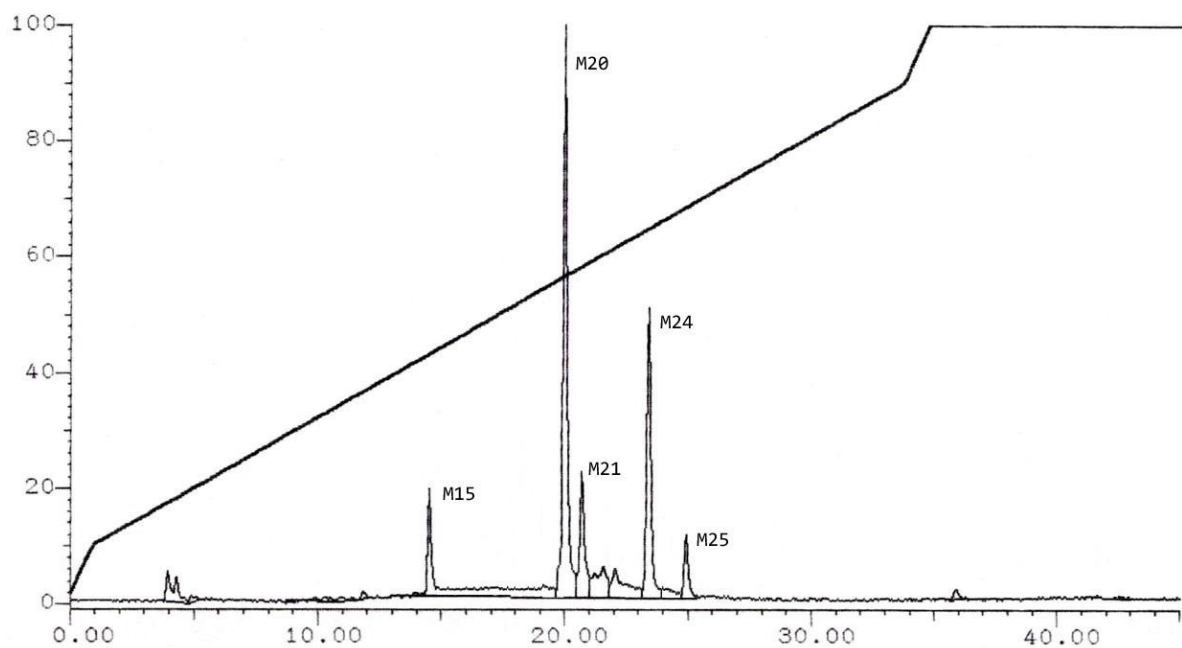

Conditions were described at 4.3. at materials and methods section.

**Figure S1.**

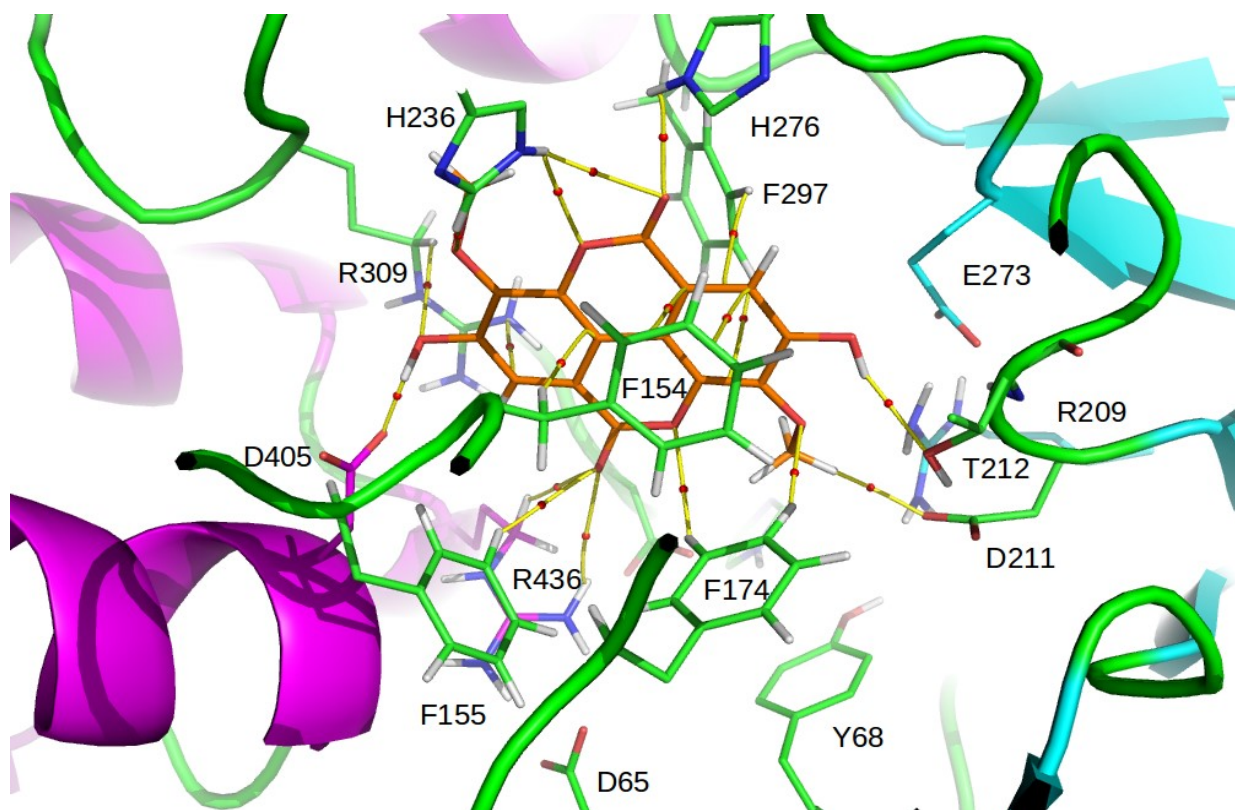

**Figure S1.** Compound 3 (orange) bound to the  $\alpha$ -Glu substrate binding cleft ( $\alpha$ -helix,  $\beta$ -sheet and loop secondary structure elements colored in magenta, cyan and green, respectively). The intermolecular interactions are evidenced by two topological elements of the charge density: the bond paths or line of maximum density linking the neighboring atoms (yellow lines) and the bond critical points on them (red points).
